# Supplementary material for: Context of injury prevention strategies in Swiss basketball: survey of athletes, medical staff and coaches
Source: HighWire-hosted journal article supplement (doi:10.1136/bmjsem-2022-001386), 2022-12-01

**Appendix 1: Perceived benefits of performing an injury prevention program according to participants (% of participants)**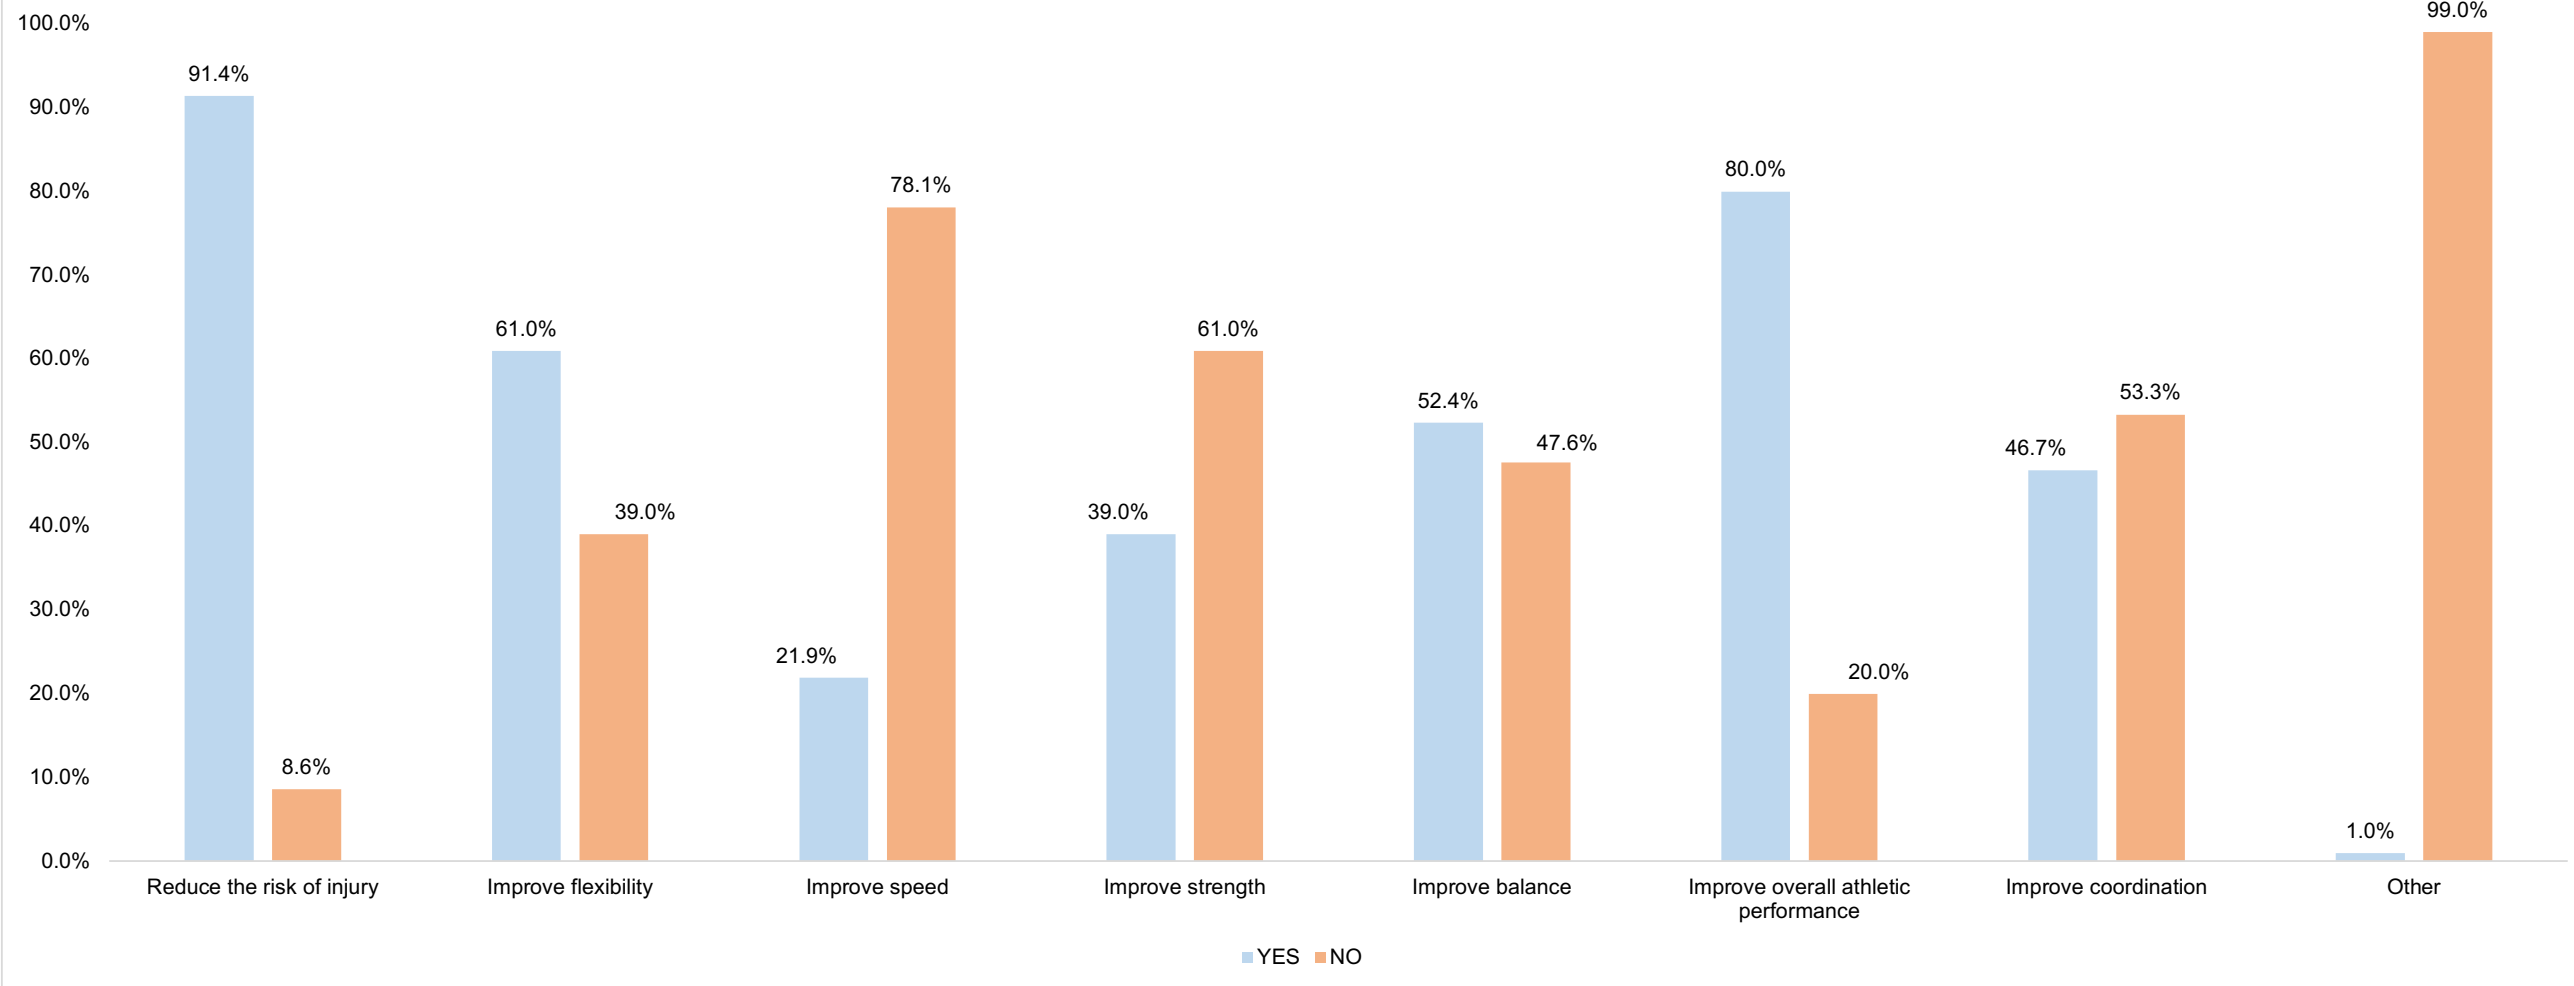

Supplement: bmjsem-2022-001386supp001_data_supplement.pdf [file bmjsem-2022-001386supp001_data_supplement.pdf]
