# Supplementary material for: Context of injury prevention strategies in Swiss basketball: survey of athletes, medical staff and coaches
Source: HighWire-hosted journal article supplement (doi:10.1136/bmjsem-2022-001386), 2022-12-01
Supplement: bmjsem-2022-001386supp003_data_supplement.pdf [file bmjsem-2022-001386supp003_data_supplement.pdf]

APPENDIX 3 : Influence of league level on training modalities that are performed more than once per week by the basketball teams. Numbers reported represent the number of participants and the % of participants per league

| NEVER PERFORMED                                  |            |            |            |       |
|--------------------------------------------------|------------|------------|------------|-------|
|                                                  | SBL (n=28) | NLB (n=53) | NL1 (n=23) | P     |
| Warm-up                                          | 2 (7.1)    | 2 (3.8)    | 1 (4.34)   | 0.602 |
| Movement Preparation                             | 3 (10.7)   | 10 (18.9)  | 5 (21.7)   | 0.878 |
| On-Court Muscular Strengthening                  | 10 (35.7)  | 15 (28.3)  | 10 (43.5)  | 0.512 |
| Muscular Strengthening before/after training     | 12 (42.9)  | 24 (45.3)  | 15 (65.2)  | 0.823 |
| Muscular Strengthening during a specific Session | 5 (17.9)   | 24 (45.3)  | 13 (56.5)  | 0.316 |
| On-Court Mobility                                | 5 (17.9)   | 18 (34.0)  | 10 (43.5)  | 0.667 |
| Session of Mobility before/after training        | 13 (46.4)  | 29 (54.7)  | 19 (82.6)  | 0.757 |
| Mobility during a specific session               | 13 (46.4)  | 37 (69.8)  | 17 (73.9)  | 0.820 |
| Coordination Training                            | 8 (28.6)   | 18 (34.0)  | 9 (39.1)   | 0.974 |
| Sprint Training                                  | 7 (25.0)   | 21 (39.6)  | 8 (34.8)   | 0.699 |
| Cooldown                                         | 11 (39.3)  | 26 (49.1)  | 14 (60.9)  | 0.998 |
| Specific IP protocol (E.g., FIFA11+)             | 18 (64.3)  | 37 (69.8)  | 20 (87.0)  | 0.868 |
| Other                                            | 21 (75.0)  | 45 (84.9)  | 20 (87.0)  | 0.667 |

n: number of participants, p: P-value, IP: Injury Prevention

| ONCE PER WEEK                                    |            |            |            |              |
|--------------------------------------------------|------------|------------|------------|--------------|
|                                                  | SBL (n=28) | NLB (n=53) | NL1 (n=23) | P            |
| Warm-up                                          | 0 (0)      | 1 (1.9)    | 3 (13.0)   | <b>0.013</b> |
| Movement Preparation                             | 2 (7.1)    | 8 (15.1)   | 5 (21.7)   | 0.293        |
| On-Court Muscular Strengthening                  | 7 (25.0)   | 24 (45.3)  | 9 (39.1)   | 0.684        |
| Muscular Strengthening before/after training     | 4 (14.3)   | 14 (26.4)  | 4 (17.4)   | 0.898        |
| Muscular Strengthening during a specific Session | 5 (17.9)   | 16 (30.2)  | 7 (30.4)   | 0.628        |
| On-Court Mobility                                | 7 (25.0)   | 19 (35.8)  | 2 (8.7)    | 0.309        |
| Session of Mobility before/after training        | 3 (10.7)   | 8 (15.1)   | 1 (4.3)    | 0.669        |
| Mobility during a specific session               | 4 (14.3)   | 9 (17.0)   | 2 (8.7)    | 0.840        |
| Coordination Training                            | 9 (32.1)   | 19 (35.8)  | 8 (34.8)   | 0.702        |
| Sprint Training                                  | 12 (42.9)  | 22 (41.5)  | 4 (17.4)   | 0.243        |
| Cooldown                                         | 2 (7.1)    | 11 (20.8)  | 4 (17.4)   | 0.564        |
| Specific IP protocol (E.g., FIFA11+)             | 4 (14.3)   | 6 (11.3)   | 0 (0)      | 0.193        |
| Other                                            | 0 (0)      | 2 (3.8)    | 0 (0)      | 0.507        |

n: number of participants, p: P-value, IP: Injury Prevention, bold: statistically significant

## MORE THAN ONCE PER WEEK

|                                                  | SBL (n=28) | NLB (n=53) | NL1 (n=23) | P            |
|--------------------------------------------------|------------|------------|------------|--------------|
| Warm-up                                          | 26 (92.9)  | 50 (94.3)  | 19 (82.6)  | 0.422        |
| Movement Preparation                             | 23 (82.1)  | 33 (62.3)  | 12 (52.2)  | 0.986        |
| On-Court Muscular Strengthening                  | 10 (35.7)  | 12 (22.6)  | 3 (13.0)   | 0.653        |
| Muscular Strengthening before/after training     | 11 (39.3)  | 13 (24.5)  | 3 (13.0)   | 0.555        |
| Muscular Strengthening during a specific Session | 15 (53.6)  | 11 (20.8)  | 2 (8.7)    | 0.060        |
| On-Court Mobility                                | 14 (50.0)  | 14 (26.4)  | 10 (43.5)  | 0.308        |
| Session of Mobility before/after training        | 8 (28.6)   | 14 (26.4)  | 2 (8.7)    | 0.391        |
| Mobility during a specific session               | 7 (25.0)   | 5 (9.4)    | 3 (13.0)   | 0.491        |
| Coordination Training                            | 7 (25.0)   | 14 (26.4)  | 5 (21.7)   | 0.755        |
| Sprint Training                                  | 5 (17.9)   | 9 (17.0)   | 10 (43.5)  | <b>0.013</b> |
| Cooldown                                         | 12 (42.9)  | 14 (26.4)  | 4 (17.4)   | 0.677        |
| Specific IP protocol (E.g., FIFA11+)             | 2 (7.1)    | 8 (15.1)   | 2 (8.7)    | 0.378        |
| Other                                            | 1 (3.6)    | 3 (5.7)    | 2 (8.7)    | 0.536        |

n: number of participants, p: P-value, IP: Injury Prevention, bold: statistically significant
