# Supplementary figures and images for: Context of injury prevention strategies in Swiss basketball: survey of athletes, medical staff and coaches
Source: HighWire-hosted journal article supplement (doi:10.1136/bmjsem-2022-001386), 2022-12-01

## APPENDIX 2: Moment at which participants's clubs use injury prevention interventions

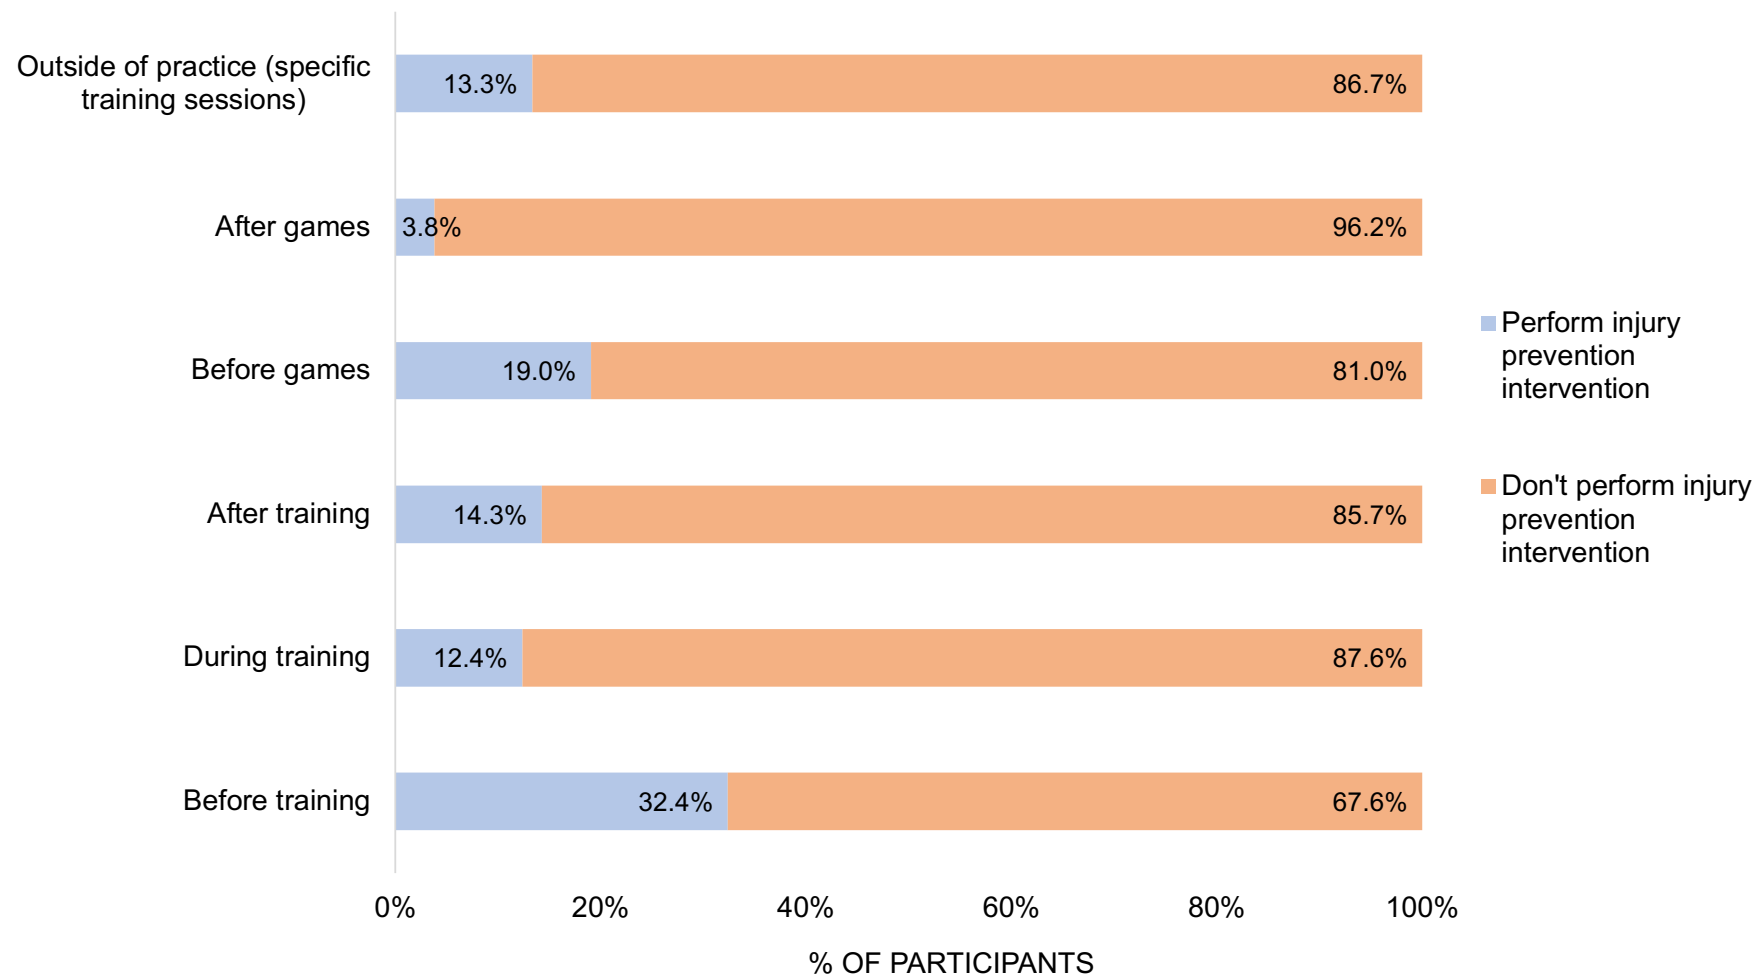

Supplement: bmjsem-2022-001386supp002_data_supplement.pdf [file bmjsem-2022-001386supp002_data_supplement.pdf]
